# Supplementary material for: Towards an integrative model of C4 photosynthetic subtypes: insights from comparative transcriptome analysis of NAD-ME, NADP-ME, and PEP-CK C4 species
Source: PubMed Central journal article supplement (PMC4085959; doi:10.1093/jxb/eru100), 2014-03-18
Supplement: supp_eru100_jexbot116442_file005.pdf [file supp_eru100_jexbot116442_file005.pdf]

Towards an integrative model of  $C_4$  photosynthetic subtypes – insights from comparative transcriptome analysis of NAD-ME, NADP-ME, and PEP-CK  $C_4$  species . Andrea Bräutigam, Simon Schliesky, Canan Külahoglu, Colin Osborne, and Andreas P M Weber. *Journal of Experimental Botany* 2014

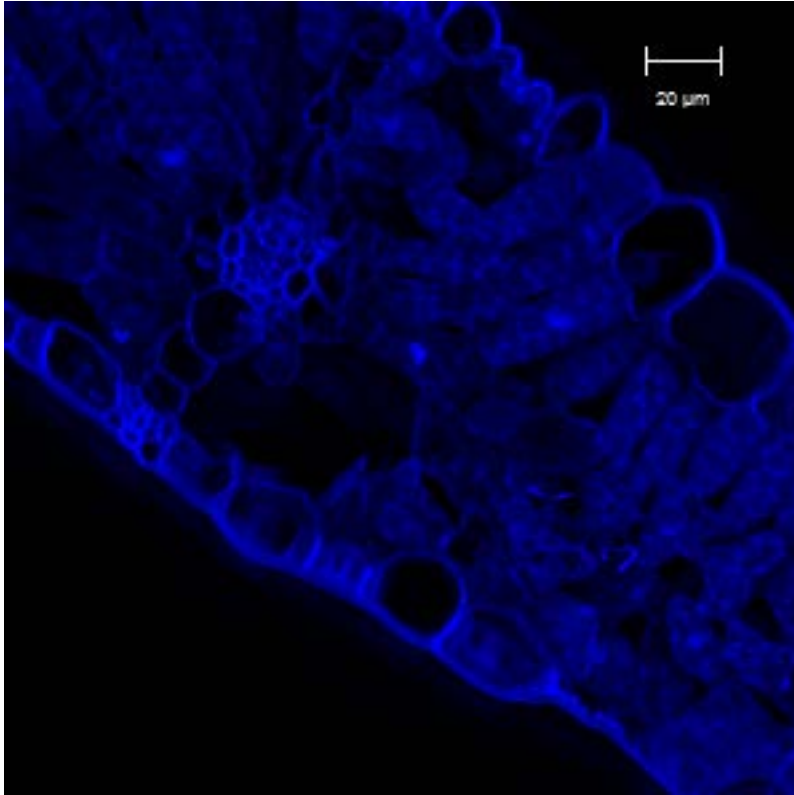

*Dichanthelium clandestinum* ( $C_3$ )

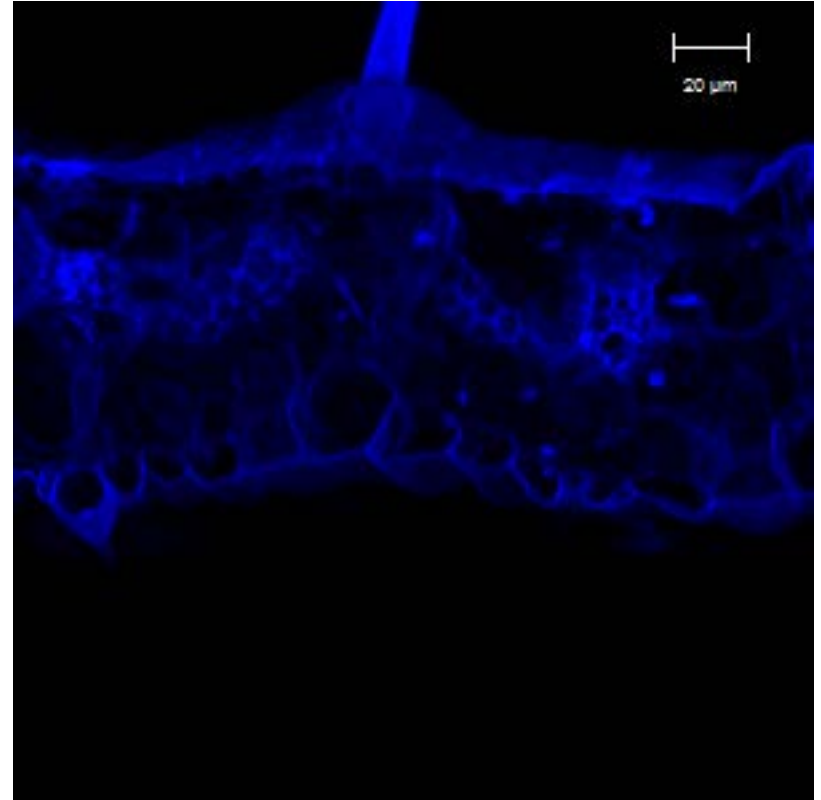

*Megathyrsus maximus* ( $C_4$ )
